# Supplementary material
Source: HighWire-hosted journal article supplement (http://www.qdcxjkg.com/highwire/filestream/126495/field_highwire_adjunct_files/12/ERJ-00937-2015_Table_S4.pdf)
Supplement: ERJ-00937-2015_Table_S4.pdf [file ERJ-00937-2015_Table_S4.pdf]

Supplementary Table S4: Multivariate survival analyses for budding

|                             |                    | <b>HR</b> | <b>lower CI (95%)</b> | <b>upper CI (95%)</b> | <b>p-value</b> |
|-----------------------------|--------------------|-----------|-----------------------|-----------------------|----------------|
| <b>Age</b>                  | <i>per year</i>    | 1.028     | 1.009                 | 1.047                 | 0.004          |
| <b>Sex</b>                  | <i>Female</i>      | 1         |                       |                       |                |
|                             | <i>Male</i>        | 1.386     | 0.890                 | 2.160                 | 0.149          |
| <b>Stage</b>                | <i>UICC 1</i>      | 1         |                       |                       | <0.001         |
|                             | <i>UICC 2</i>      | 1.617     | 1.111                 | 2.354                 |                |
|                             | <i>UICC 3</i>      | 2.653     | 1.811                 | 3.885                 |                |
|                             | <i>UICC 4</i>      | 4.395     | 1.358                 | 14.218                |                |
| <b>Budding (per 10 HPF)</b> | <i>&lt;5 nests</i> | 1         |                       |                       | <0.001         |
|                             | <i>5-14 nests</i>  | 1.585     | 1.097                 | 2.291                 |                |
|                             | <i>≥15 nests</i>   | 2.391     | 1.676                 | 3.410                 |                |
